# Supplementary material for: Continuous flow purification of nanocrystal quantum dots
Source: Royal Society of Chemistry journal article supplement (doi:10.1039/c4nr04351k), 2014-01-01
Supplement: c4nr04351k1.pdf [file c4nr04351k1.pdf]

## Supporting Information

### Continuous flow purification of nanocrystal quantum dots

*Duckjong Kim<sup>\*†,§</sup>, Hye Kyung Park<sup>†</sup>, Hyekyoung Choi<sup>†,§</sup>, Jaehong Noh<sup>†</sup>, Kyungnam Kim<sup>†</sup>,  
and Sohee Jeong<sup>\*†,§</sup>*

<sup>†</sup>Department of Nano Mechanics, Korea Institute of Machinery and Materials (KIMM),  
Daejeon 305-343, South Korea.

<sup>§</sup>Korea University of Science and Technology (UST), 206 Gajeong-ro, Daejeon 305-350,  
South Korea.

\* To whom correspondence should be addressed, [dkim@kimm.re.kr](mailto:dkim@kimm.re.kr), [sjeong@kimm.re.kr](mailto:sjeong@kimm.re.kr)

## Microfluidic Chip Fabrication

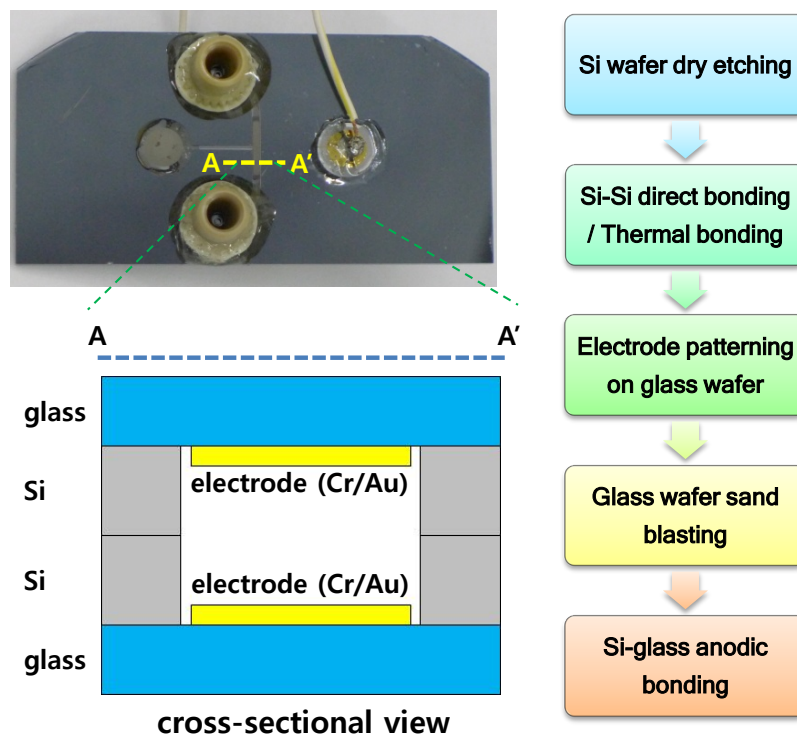

**Figure S1:** Fabrication process and fabricated microfluidic chip.

## QD size analysis

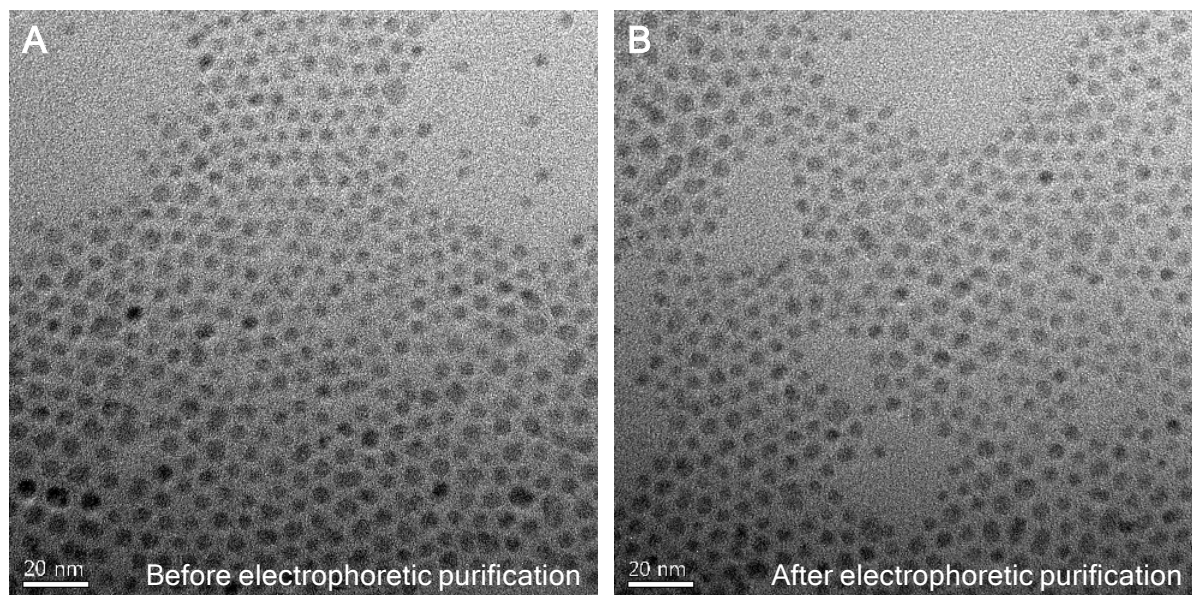

**Figure S2. TEM micrographs of the CdSe QDs before (A) and after (B) electrophoretic purification at 50 V. CdSe QDs before and after our process are  $5.10 \pm 0.64$  nm and  $5.10 \pm 0.61$  nm in diameter respectively.**

### The effect of the solution environment (dilution) on removal of ligands

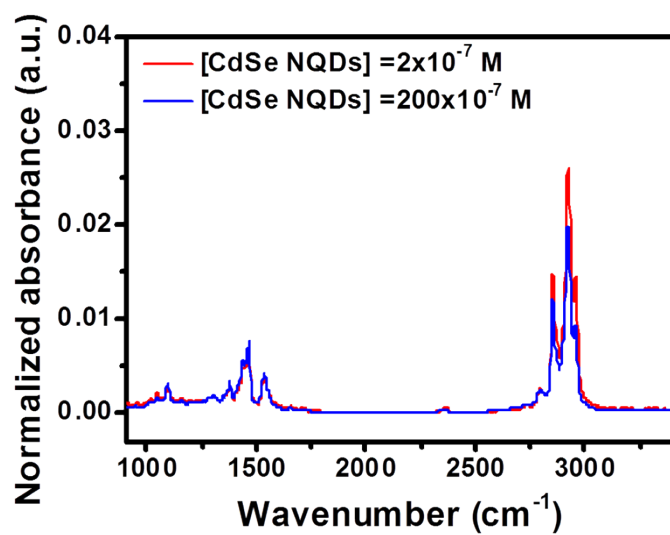

**Figure S3.** ATR-FTIR spectra of CdSe QDs capped with oleate before (blue line) and after (red line) 100 fold dilution by hexane.
